# Supplementary material
Source: Springer Nature journal article supplement (https://www.springermedizin.de/resource/supplementary/12959_2013_228_MOESM2_ESM.pdf/9569242)
Supplement: MOESM2 [file 9569242]

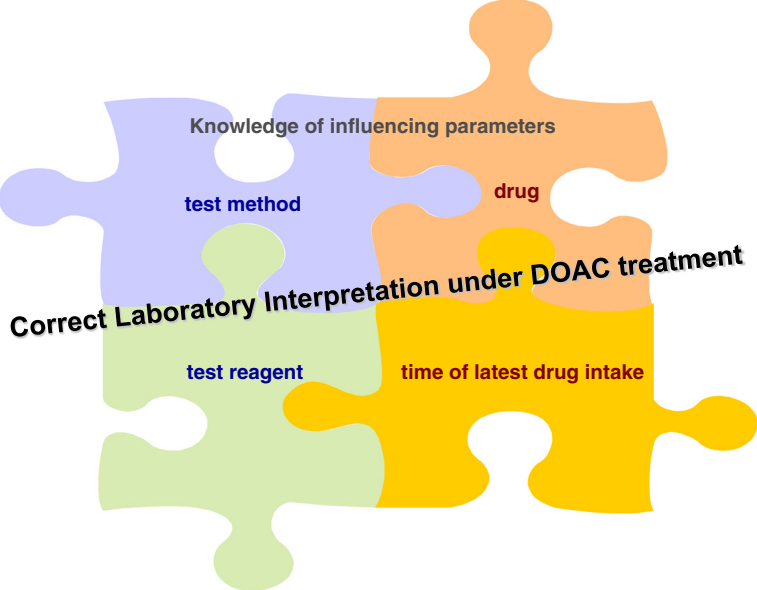

Knowledge of influencing parameters

test method

drug

test reagent

time of latest drug intake

**Correct Laboratory Interpretation under DOAC treatment**
